# Supplementary material for: The ribosome receptors Mrx15 and Mba1 jointly organize cotranslational insertion and protein biogenesis in mitochondria
Source: PubMed Central journal article supplement — Mol Biol Cell. 2018 Oct 1;29(20):2386–96. doi: 10.1091/mbc.E18-04-0227 (PMC6233058; doi:10.1091/mbc.e18-04-0227), 2018-10-01
Supplement: mbc-29-2386-s001.pdf [file mbc-29-2386-s001.pdf]

# Supplemental Materials

*Molecular Biology of the Cell*

Möller-Hergt et al.

Supplemental Table 1. *Saccharomyces cerevisiae* strains used in this study.

| Name                                           | Parental strain | Nuclear genotype                                                                                 | Mitochondrial genotype | References          |
|------------------------------------------------|-----------------|--------------------------------------------------------------------------------------------------|------------------------|---------------------|
| W303                                           |                 | <i>Mat a ura3-1 trp1Δ 2 leu2-3,112 his3-11,15 ade2-1 can1-100</i>                                | wt; intron containing  |                     |
| MOY081 <i>mba1Δ</i>                            | W303            | <i>Mat a ura3-1 trp1Δ 2 leu2-3,112 his3-11,15 ade2-1 can1-100 mba1::HIS3</i>                     | wt; intron containing  | Ott et al. 2006     |
| MOY849 <i>mrx15Δ</i>                           | W303            | <i>Mat a ura3-1 trp1Δ 2 leu2-3,112 his3-11,15 ade2-1 can1-100 mrx15::kanMX4</i>                  | wt; intron containing  | This study          |
| MOY791 <i>mrx15Δmba1Δ</i>                      | W303            | <i>Mat a ura3-1 trp1Δ 2 leu2-3,112 his3-11,15 ade2-1 can1-100 mba1::HIS3 mrx15::kanMX4</i>       | wt; intron containing  | This study          |
| MOY1556 <i>mdm38Δ</i>                          | W303            | <i>Mat a ura3-1 trp1Δ 2 leu2-3,112 his3-11,15 ade2-1 can1-100 mdm38::URA3</i>                    | wt; intron containing  | This study          |
| MOY1557 <i>mdm38Δmrx15Δ</i>                    | W303            | <i>Mat a ura3-1 trp1Δ 2 leu2-3,112 his3-11,15 ade2-1 can1-100 mdm38::URA3 mrx15::kanMX4</i>      | wt; intron containing  | This study          |
| MOY1306 <i>nuc1Δ</i> Mrx15-PA/His              | W303            | <i>Mat a ura3-1 trp1Δ 2 leu2-3,112 his3-11,15 ade2-1 can1-100 MRX15PAHis::HIS3 nuc1::URA3</i>    | wt; intron containing  | This study          |
| MOY1497 Mrx15 <sup>1-130</sup> ΔC              | W303            | <i>Mat a ura3-1 trp1Δ 2 leu2-3,112 his3-11,15 ade2-1 can1-100 mrx15-C130-PA::HIS3</i>            | wt; intron containing  | This study          |
| MOY1498 Mrx15 <sup>1-130</sup> ΔC <i>mba1Δ</i> | W303            | <i>Mat a ura3-1 trp1Δ 2 leu2-3,112 his3-11,15 ade2-1 can1-100 mrx15-C130-PA::HIS3 mba1::URA3</i> | wt; intron containing  | This study          |
| MOY014 Oxa1 <sup>1-331</sup> ΔC                | CW04            | <i>Mat α ura3-1 trp1-1 leu2-3, 12 his3-11,15 ade2-1 can1-100 oxa1-K332*</i>                      | wt; intron containing  | Szyrach et al. 2003 |
| MOY1359 Oxa1 <sup>1-331</sup> ΔC <i>mrx15Δ</i> | CW04            | <i>Mat α ura3-1 trp1-1 leu2-3, 12 his3-11,15 ade2-1 can1-100 oxa1-K332* mrx15::kanMX4</i>        | wt; intron containing  | This study          |
| MOY1299 <i>nuc1Δ</i> Mrx15-Flag                | W303            | <i>Mat a ura3-1 trp1Δ 2 leu2-3,112 his3-11,15 ade2-1 can1-100 MRX15FLAG::HIS3 nuc1::URA3</i>     | wt; intron containing  | This study          |

# Supplemental Figure 1

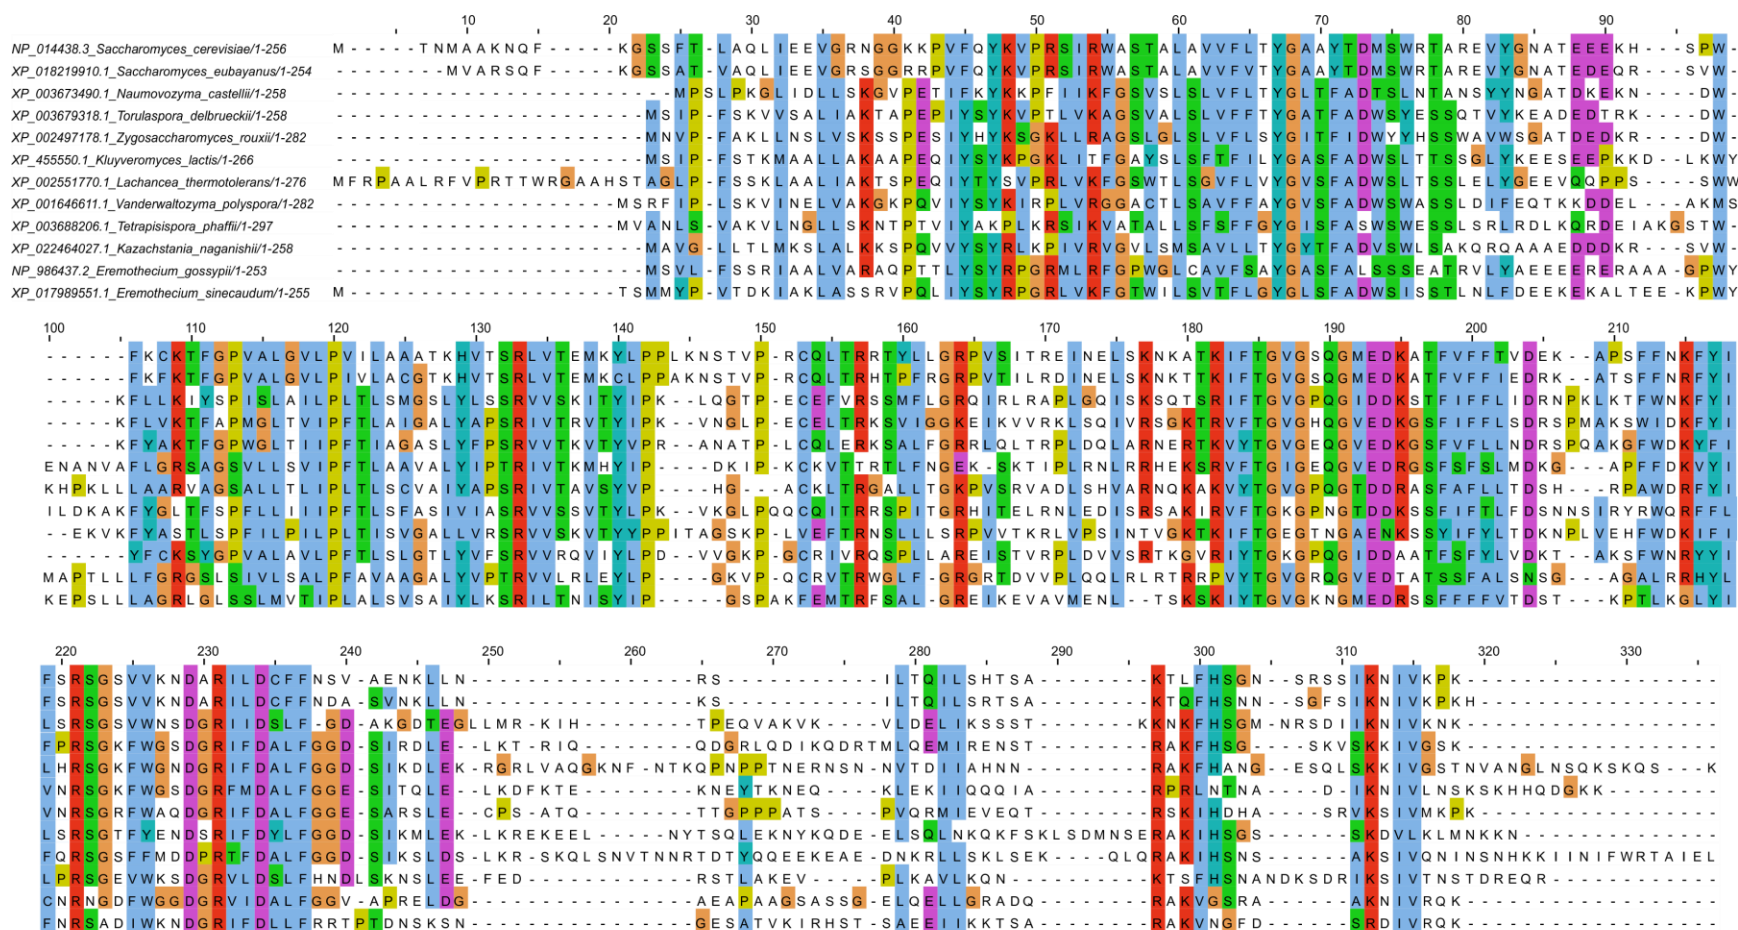

Supplemental Figure 1: Multiple sequence alignment of Mrx15 homologs found by BLAST search. Representative candidates were aligned by the MAFFT algorithm and are displayed according to the Clustal color convention.
